# Supplementary material
Source: publisher figshare collection journal article supplement (https://acs.figshare.com/ndownloader/files/34076162)
Supplement: Supplementary file 1 [file 34076162]

**Supporting Information: Ionic association in**  
 **$\text{CH}_3-(\text{CH}_2-\text{CF}_2)_n-\text{CH}_3(\text{PVDF})-\text{Li}^+-(\text{CF}_3\text{SO}_2)_2\text{N}^-$**   
**for n=1,4: A computational approach**

Mathew Daniel, Susan G. Duggan, Kyung Seol, Gregory J. McManus and  
Nilesh R. Dhumal\*\*

*Department of Chemistry and Physics, Florida Gulf Coast University, Fort Myers,  
FL33965, USA*

E-mail: ndhumal@fgcu.edu

Table S1: Zero-point corrected electronic (E in AU) and relative stabilization energy ( $\Delta E$  in kJ/mole) of conformers of  $\text{CH}_3-(\text{CH}_2-\text{CF}_2)_n-\text{CH}_3$  (n=1-4)

| System | E            | $\Delta E$ |
|--------|--------------|------------|
| M1     | -356.8354    | 0          |
| M2     | -356.834589  | 2.13       |
| D1     | -633.904027  | 0          |
| D2     | -633.898765  | 13.82      |
| T1     | -910.971566  | 0          |
| T2     | -910.961657  | 26.02      |
| Te1    | -1188.03966  | 0          |
| Te2    | -1188.036581 | 8.08       |
| Te3    | -1188.033567 | 16         |
| Te4    | -1188.024471 | 39.88      |

Table S2: Electronic (E in AU) and relative stabilization energy ( $\Delta E$  in kJ/mole) of conformers of  $\text{CH}_3-(\text{CH}_2-\text{CF}_2)_n-\text{CH}_3$  (n=1) obtained from different methods

| Method          | M1 (g) (in au) | M2 (t) (in au) | M1-M2 (in kJ/mole) |
|-----------------|----------------|----------------|--------------------|
| B3LYP/6-31G**   | -356.952197    | -356.951410    | -2.07              |
| B97D/6-31G**    | -356.762149    | -356.761903    | -0.65              |
| B3LYP/6-31++G** | -356.975534    | -356.975904    | 0.97               |
| MP2/6-31G**     | -355.034623    | -355.035656    | 2.71               |

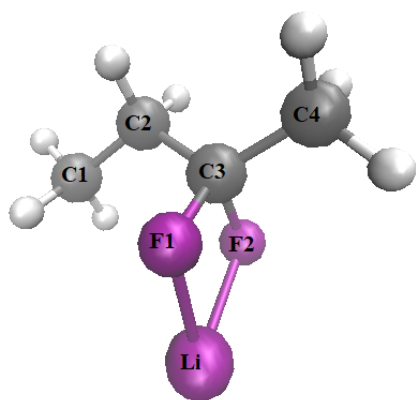

C11

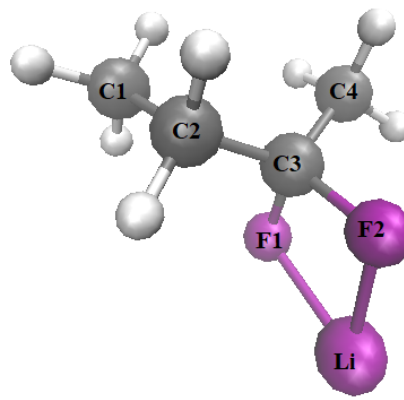

C12

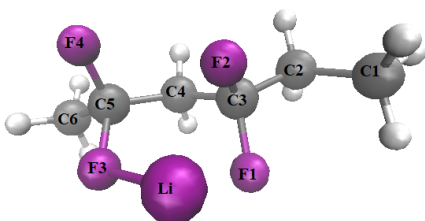

C21

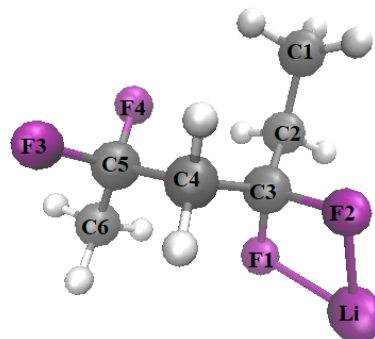

C22

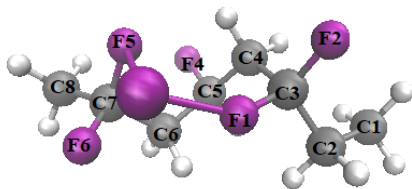

C31

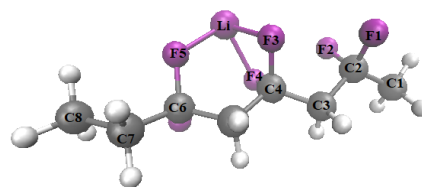

C33

Figure S1: Optimized geometries of different conformers of  $\text{Li}^+ \text{-CH}_3 \text{-(CH}_2 \text{-CF}_2)_n \text{-CH}_3$  ( $n=1-3$ ).

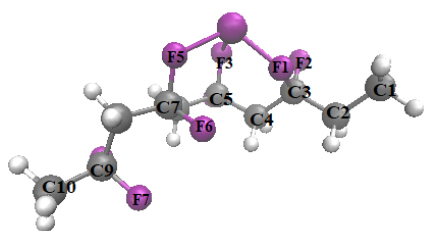

C41

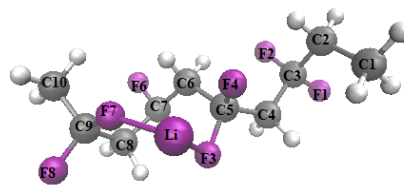

C42

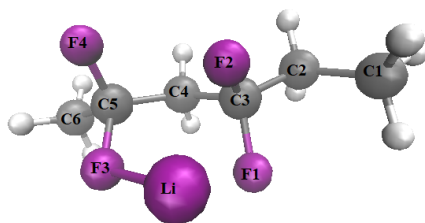

C43

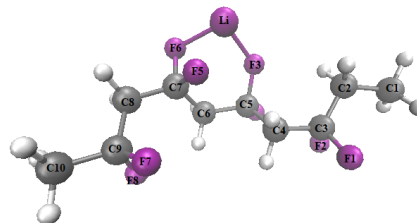

C44

Figure S2: Optimized geometries of different conformers of  $\text{Li}^+\text{-CH}_3\text{-(CH}_2\text{-CF}_2\text{)}_4\text{-CH}_3$ .
